# Supplementary material
Source: publisher figshare collection journal article supplement (https://sage.figshare.com/ndownloader/files/14146481)
Supplement: Supplementary file 1 [file 14146481]

### ONLINE SUPPLEMENT to article in

AMERICAN SOCIOLOGICAL REVIEW, 2019, VOL. 84

#### Getting to Know You: Welfare Fraud Investigation and the Appropriation of Social Ties

Spencer Headworth  
*Purdue University*

**Table S1.** Interviewee Characteristics

|           |             |        |           |               |
|-----------|-------------|--------|-----------|---------------|
| Adriana   | Northeast   | White  | Early-40s | Coordinator   |
| Andrew    | Eastcoast   | White  | Early-30s | Analyst       |
| Antoine   | Southeast   | Black  | Mid-50s   | Supervisor    |
| Ashley    | Southwest   | White  | Mid-30s   | Investigator  |
| Billy     | Eastcoast   | White  | Mid-20s   | Analyst       |
| Brian     | Midatlantic | White  | Late-30s  | Manager       |
| Carly     | Southwest   | White  | Early-30s | Supervisor    |
| Caroline  | Eastcoast   | White  | Mid-40s   | Manager       |
| Danielle  | Southeast   | White  | Late-40s  | Investigator  |
| Diego     | Eastcoast   | Latino | Late-30s  | Investigator  |
| Dusty     | Southwest   | White  | Late-20s  | Investigator  |
| Edward    | Eastcoast   | White  | Mid-50s   | Administrator |
| Frank     | Midatlantic | White  | Late-50s  | Administrator |
| George    | Eastcoast   | White  | Early-60s | Administrator |
| Geraldine | Southeast   | Black  | Late-40s  | Investigator  |
| Hank      | Midatlantic | White  | Mid-40s   | Manager       |
| Helen     | Southeast   | Black  | Early-40s | Supervisor    |
| Jack      | Southeast   | White  | Late-40s  | Manager       |
| Keith     | Southwest   | White  | Late-20s  | Coordinator   |
| Ken       | Northeast   | White  | Late-40s  | Administrator |
| Leslie    | Southeast   | White  | Late-30s  | Investigator  |
| Luis      | Eastcoast   | Latino | Early-50s | Manager       |
| Mary Anne | Eastcoast   | White  | Early-50s | Supervisor    |
| Morgan    | Northeast   | White  | Mid-30s   | Coordinator   |
| Oscar     | Southwest   | White  | Early-60s | Manager       |
| Patricia  | Eastcoast   | White  | Mid-50s   | Investigator  |
| Penelope  | Midatlantic | White  | Late-40s  | Administrator |
| Peter     | Southeast   | White  | Late-50s  | Supervisor    |
| Ramona    | Southwest   | White  | Early-50s | Investigator  |
| Robert    | Eastcoast   | White  | Mid-60s   | Administrator |
| Roger     | Northeast   | White  | Early-60s | Administrator |
| Rosemary  | Southeast   | White  | Early-50s | Supervisor    |
| Sandra    | Northeast   | White  | Mid-50s   | Manager       |
| Stephen   | Eastcoast   | Black  | Mid-40s   | Manager       |
| Sue       | Southwest   | White  | Mid-40s   | Investigator  |
| Tabitha   | Northeast   | White  | Mid-40s   | Investigator  |
| Tiffany   | Eastcoast   | White  | Mid-20s   | Investigator  |
| Todd      | Southwest   | White  | Late-40s  | Supervisor    |
| Veronica  | Northeast   | White  | Early-60s | Administrator |
| Vincent   | Eastcoast   | White  | Late-40s  | Manager       |
| Wanda     | Eastcoast   | White  | Late-40s  | Manager       |
| Zosia     | Eastcoast   | White  | Early-50s | Manager       |
